# Supplementary material
Source: PubMed Central journal article supplement (PMC5971562)

**Supplementary Table 1:** List of Primers and plasmids used in this study.

**Supplementary Table 2:** Percent of active RNAP from each preparation as determined from primer extension (Figure 5B). Percent activity was calculated by dividing the sum of density for the 7-mer and 9-mer by the total density in the lane for each RNAP. Values are averages derived from three independent measurements.

**Supplementary Figure 1:** Sequence of source DNA template used in the study. Sequence is of native H37Rv genomic DNA (+1468189 to +1468605) -66 to +351 of the transcription start site of the *rrnA3* promoter. The -10 and -35 elements are highlighted and the transcription start site is in green. Sites of mutagenesis are also highlighted. Endogenous MscI restriction site used for pEC26 plasmid construction is not highlighted.

**Supplementary Figure 2:** SDS-PAGE of all RNAPs (left panel) and trans-acting transcription factors (right panel) used in this study.

**Supplementary Figure 3:** **A)** Phosphorimages of polyacrylamide gels used to determine open-complex stability for each RNAP in the presence and absence of CarD. **B)** Plots showing the decay of the open-promoter complex over time for each of the RNAPs in this study. All experiments are performed in triplicate.

**Supplementary Figure 4:** Phosphorimages of polyacrylamide gels of elongating MTB RNAPs. Time points for the  $\beta$ S450L mutant\*\* (min): 2, 3, 4, 5, 7.5, 10, 12.5, 15, 20, 30, 45. Time points for all other RNAPs (min): 0.25, 0.5, 0.75, 1, 1.25, 1.5, 2, 2.5, 3, 5, 15.

**Supplementary Figure 5:** Phosphorimages of polyacrylamide gels used to determine hydrolysis of RNA primer. **A)** RNA•DNA scaffold used in this study. **B)** Radiograph showing primer extension and hydrolysis of RNA8 primer.

**Supplementary Figure 6:** Phosphorimages of polyacrylamide gels used to determine open-complex stability for each RNAP in the presence and absence of CarD.

## Supplementary Table 1

| Primer Name               | Sequence 5'-3'                                                                                                            |
|---------------------------|---------------------------------------------------------------------------------------------------------------------------|
| Mt rrnA3 -66<br>AMP FOR   | GATC <b>ACATGT</b> ATGGATATCTATGGATGACCGAACCTGG                                                                           |
| Mt rrnA3 +351<br>AMP REV  | GATC <b>GAATTC</b> CCAGTTTCCAGGCTTATCCCGAAGTGC                                                                            |
| SynB<br>Terminator<br>FOR | GACTT <b>CTAGA</b> AAGAAAAAAAAAAGCGCCGCAACTGCGGCGCTTTTTTTTTT<br>CAGGTATCTAT <b>CTAG</b> AGACT                             |
| SynB<br>Terminator<br>REV | AGTCT <b>CTAG</b> ATAGATACCTGAAAAAAAAAAGCGCCGAGTTGCGGCGCT<br>TTTTTTTTTCTT <b>CTAGA</b> AGTC                               |
| EC26 DNA<br>Fragment FOR  | <b>GACATGT</b> AAATATTTGTTGTTAACTCTTGACAAAAGTGTTAAAAGCGGCTA<br>GTATTTAAAGGGATGGATGAGATTTGAAGGTTGGGTCC <b>CATGGCC</b> AGAT |
| EC26 DNA<br>Fragment REV  | ATCT <b>GGCCAT</b> GGGACCCAACCTTCAAATCTCATCCATCCCTTTAAATACT<br>AGCCGCTTTTAAACACTTTTGTCAAGAGTTAACAACAATATTT <b>ACATGTC</b> |
| EC19 AMP<br>FOR           | ATGGATATCTATGGATGACCGAACCTGG                                                                                              |
| EC26 AMP<br>FOR           | TTGTTGTTAACTCTTGACAAAAGTGTTAAAAGCGG                                                                                       |
| EC AMP REV                | GCCTGCAGGTCGACTCTAGAGG                                                                                                    |
| rrnA3 EC19<br>FOR         | GACTGGCAGGGTTGCCCGTTGCGGGC0GG                                                                                             |
| rrnA3 EC19<br>REV         | CCGCCCGCA <b>AC</b> CGGGGCAACCCTGCCAGTC                                                                                   |
| CarD AMP<br>FOR           | GGGAATTC <b>CATATG</b> ATTTTCAAGGTCGGAGACACCGTTGTC                                                                        |
| CarD AMP<br>REV           | GATCCCG <b>GATCCT</b> CAAGACGCGGGCGGCTAAAACCTCGTCAAG                                                                      |
| NusA AMP<br>FOR           | CCGG <b>CATATG</b> AACATCGACATGGCTGCTCTGCATGCC                                                                            |
| NusA AMP<br>REV           | ACGCG <b>GATCCT</b> TAGCGGTCGTGCGCCATACCGC                                                                                |
| NusG AMP<br>FOR           | GCGC <b>CATATG</b> GTGACTACCTTCGACGGT                                                                                     |
| NusG AMP<br>REV           | GCGC <b>CTCGAG</b> CTAGATCTTGGAGACTTG                                                                                     |

- Restriction sites are in bold and mutagenesis sequences are underlined

| Plasmid        | Purpose                                              |
|----------------|------------------------------------------------------|
| pET19bpps-CarD | Expression of MTB CarD                               |
| pET19bpps-NusA | Expression of MTB NusA                               |
| pET19bpps-NusG | Expression of MTB NusG                               |
| pMt-rrnA3      | Template manipulation vector for assays              |
| pMt-rrnA3-synB | Open-promoter half-life determination                |
| pEC19          | Amplification of EC19 template                       |
| pEC26-Tuf      | Amplification of Tuf terminator containing template  |
| pEC26-MetK     | Amplification of MetK terminator containing template |

**Supplementary Table 2**

|                                                        | <b>% Active RNAP</b> |
|--------------------------------------------------------|----------------------|
| <b>WT</b>                                              | 55                   |
| <b><math>\beta</math>D435V</b>                         | 73                   |
| <b><math>\beta</math>H445Y</b>                         | 49                   |
| <b><math>\beta</math>S450L</b>                         | 53                   |
| <b><math>\beta</math>'F452L</b>                        | 67                   |
| <b><math>\beta</math>'V483G</b>                        | 64                   |
| <b><math>\beta</math>S450L<math>\beta</math>'F452L</b> | 47                   |
| <b><math>\beta</math>S450L<math>\beta</math>'V483G</b> | 47                   |

## Supplementary Figure 1

-66 -35 -10 +1 pMt-EC19 EC19  
 ATGGATATCTATGGATGACCGAACCTGGTCTT**GACT**CCATTGCCGGATTTGTATT**AGACT**GGCAGGGTTGCCCCGAAGCGGGCGGAAACAAGCAA  
 GCGTGTGTTTGAGAACTCAATAGTGTGTTTGGTGGTTTCACATTTTTGTTGTTATTTTTGGCCATGCTCTTGATGCCCCGTTGTCGGGGCGTGGC  
 CGTTTGTGTTGTCAGGATATTTCTAAATACCTTTGGCTCCCTTTTCAAAGGGAGTGTGGGTTTTGTTGGAGAGTTTGATCCTGGCTCAGGACGA  
 ACGCTGGCGGCGTGCTTAACACATGCAAGTCAACGGAAGGTCTCTTCGGAGATACTCGAGTGCGAACGGGTGAGTAACACGTGGGTGATCTG  
 CCCTGCACCTCGGGATAAGCCTGGGAAACTGGGAATTCGAGCTCGGTACCCGGGGATCCTCTAGAGTCGACCTGCAGGC +398

## Supplementary Figure 2

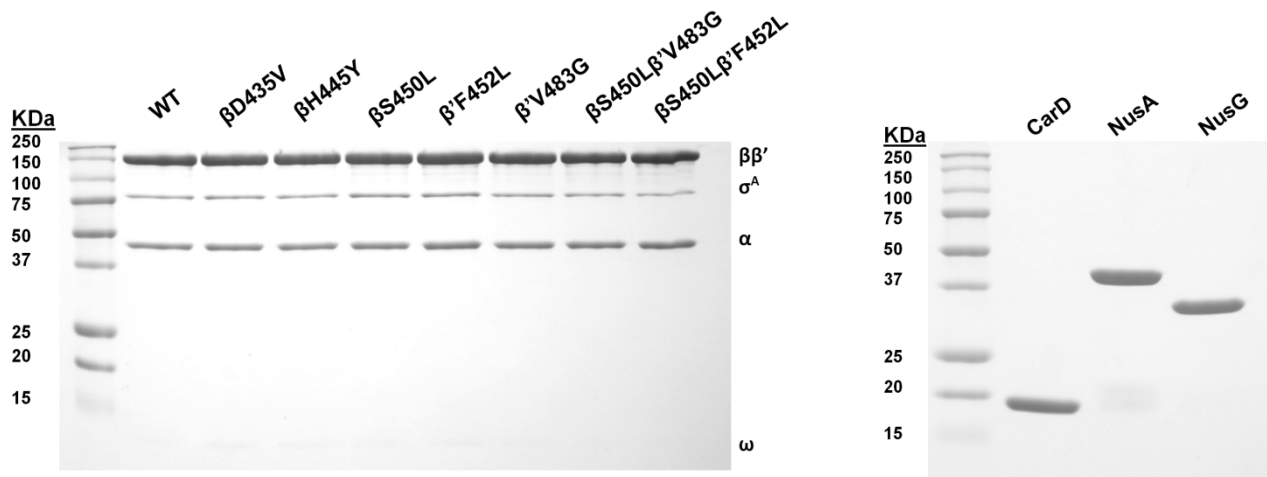

### Supplementary Figure 3

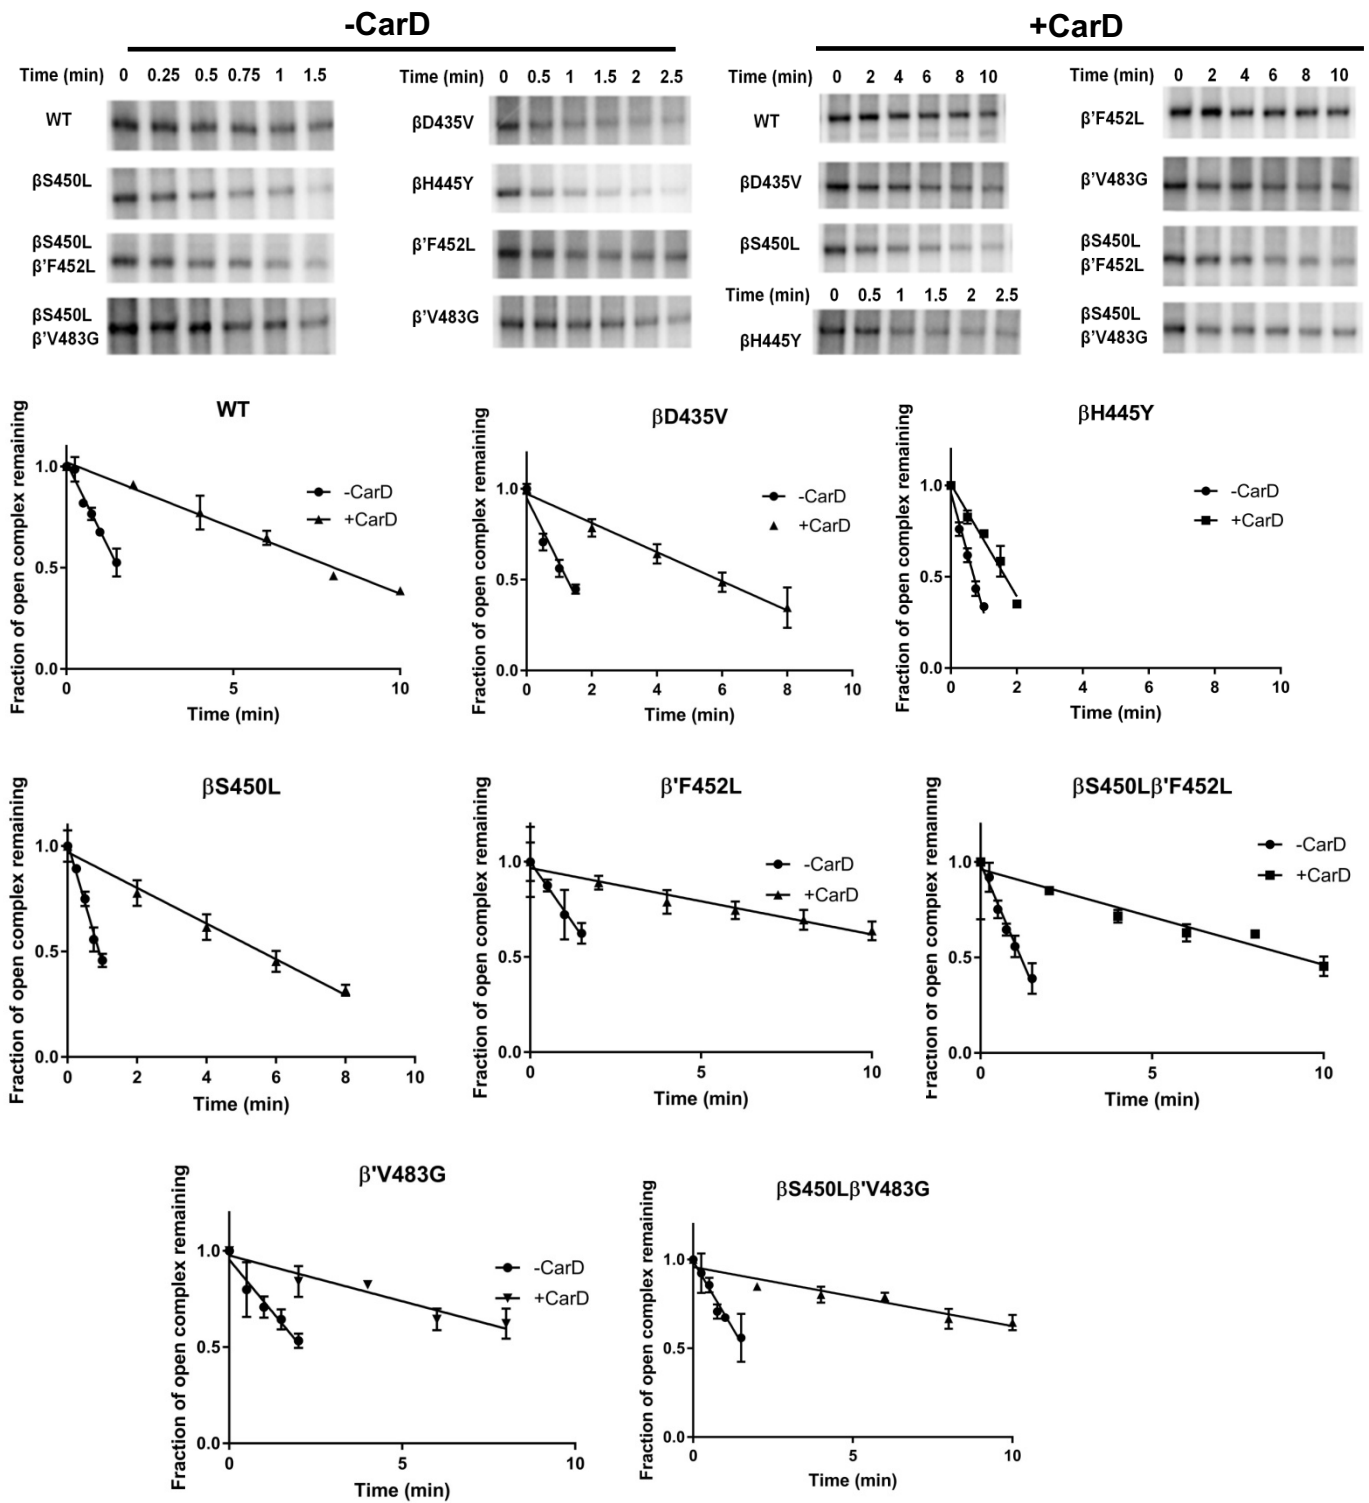

## Supplementary Figure 4

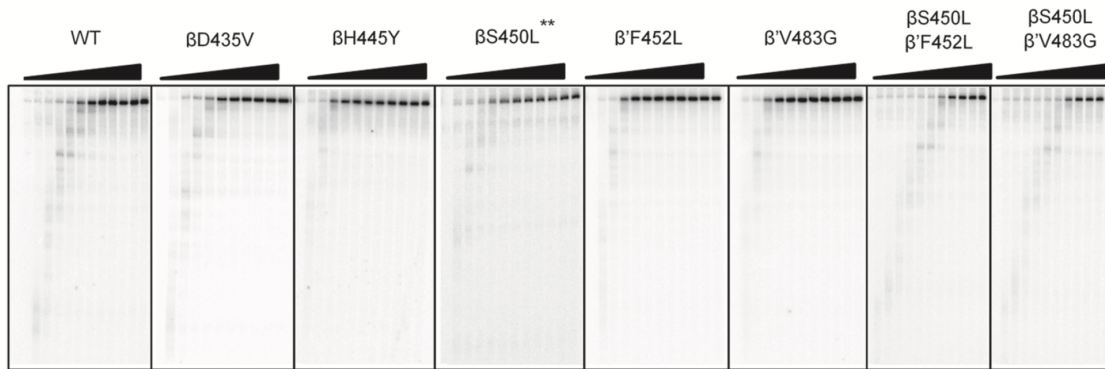

## Supplementary Figure 5

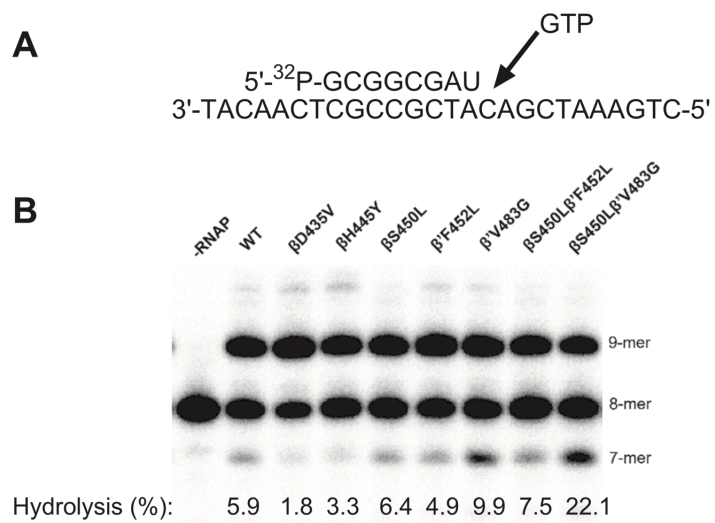

**Supplementary Figure 6**

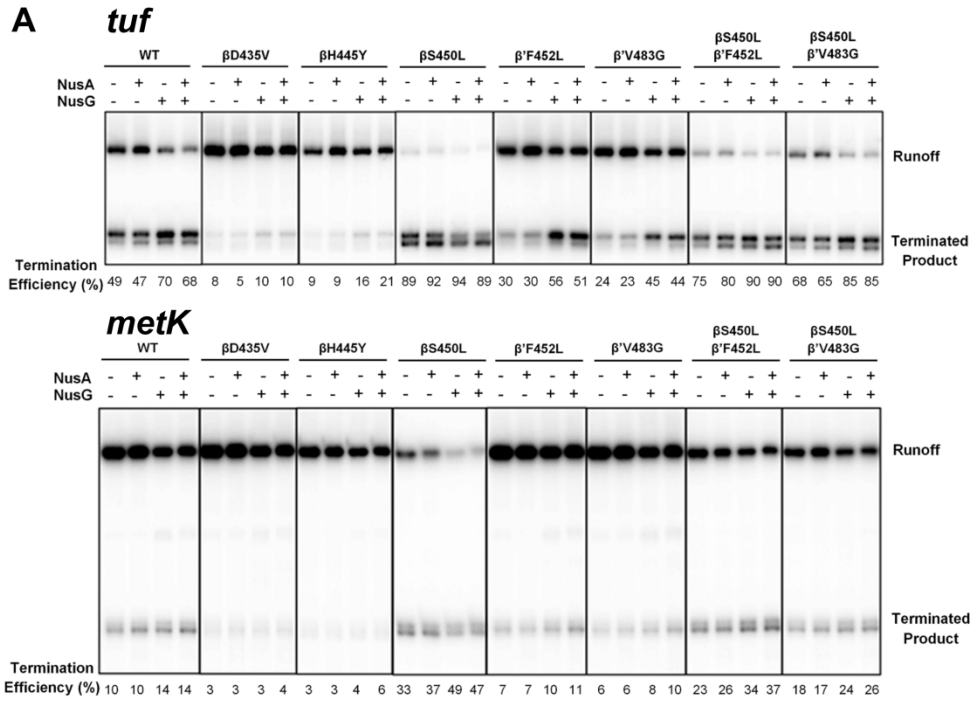

Supplement: AAC.00164-18_zac006187226s1.pdf [file AAC.00164-18_zac006187226s1.pdf]
